# Supplementary material for: Quality of T-Cell Response to SARS-CoV-2 mRNA Vaccine in ART-Treated PLWH
Source: MDPI journal article supplement (doi:10.3390/ijms232314988), 2022-11-30
Supplement: s1 [file s1]

**Table S1.** Demographic and clinical characteristics of study population at each time-point

|                                         | PLWH (n=37)          |                      |                      | HD (n=18)  |            |
|-----------------------------------------|----------------------|----------------------|----------------------|------------|------------|
|                                         | T0                   | T1                   | T2                   | T0         | T1         |
| Number                                  | 31                   | 28                   | 27                   | 12         | 15         |
| Age, median (IQR) years                 | 62 (48-68)           | 63 (56-69)           | 61 (47-68)           | 42 (33-53) | 38 (30-52) |
| Male/Female                             | 23/8                 | 21/7                 | 18/9                 | 4/8        | 3/12       |
| Current CD4 cell count (cells/ $\mu$ l) | 557 (367-719)        | 536 (353-727)        | 495 (231-719)        |            |            |
| CD4+ cell count nadir, (cells/ $\mu$ l) | 119 (22-310)         | 146 (24-305)         | 80 (13-310)          |            |            |
| HIV-RNA zenith (cp/ml)                  | 86100 (16957-508750) | 75010 (15260-508750) | 69251 (15260-264883) |            |            |
| HIV-RNA (cp/ml)                         | 82 (40-167)          | 40 (40-164)          | 124 (40-510)         |            |            |
| ART                                     |                      |                      |                      |            |            |
| Dual (%)                                | 8/31 (26%)           | 7/28 (25%)           | 8/27 (30%)           |            |            |
| Non-Dual (%)                            | 25/31 (74%)          | 21/28 (75%)          | 19/27 (70%)          |            |            |
| Comorbidities                           |                      |                      |                      |            |            |
| Any (%)                                 | 7/31 (23%)           | 6/28 (21%)           | 4/27 (15%)           |            |            |
| More than one (%)                       | 24/31 (77%)          | 22/28 (79%)          | 23/27 (85%)          |            |            |
| HCV serostatus                          |                      |                      |                      |            |            |
| anti-HCV Ab positive (%)                | 7/31 (23%)           | 7/28 (25%)           | 5/27 (19%)           |            |            |
| Smoke status                            |                      |                      |                      |            |            |
| No (%)                                  | 22/31 (71%)          | 20/28 (71%)          | 22/27 (81%)          |            |            |
| Yes (%)                                 | 9/31 (29%)           | 8/28 (29%)           | 5/27 (19%)           |            |            |

**Table S2.** Medians and IQR of immunological parameters in PLWH and HD at T0 and T1

|                          | PLWH             |                  | HD               |                  |
|--------------------------|------------------|------------------|------------------|------------------|
|                          | T0               | T1               | T0               | T1               |
| Anti-S antibody levels   | 156 [66-330.50]  | 2770 [1730-8570] | 369 [189-700.50] | 1660 [1520-9400] |
| % of triple-positive CD4 | 0.03 [0.01-0.11] | 0.0 [0.0-0.07]   | 0.10 [0.10-0.10] | 0.10 [0.10-0.10] |
| % of triple-positive CD8 | 0.02 [0.0-0.12]  | 0.01 [0.0-0.10]  | 0.10 [0.04-0.10] | 0.10 [0.05-0.11] |
| % of responding CD4      | 1.56 [0.39-5.01] | 2.67 [0.53-3.65] | 1.98 [1.52-3.29] | 1.39 [0.70-2.05] |
| % of responding CD8      | 0.95 [0.36-2.85] | 0.68 [0.19-3.43] | 1.82 [1.42-3.48] | 1.02 [0.17-1.70] |

**Table S3.** Medians and IQR of immunological parameters in PLWH stratified according to CD4 cell count

|                          | <200 cells/ $\mu$ l |                     | >200 cells/ $\mu$ l |                  |
|--------------------------|---------------------|---------------------|---------------------|------------------|
|                          | T0                  | T1                  | T0                  | T1               |
| Anti-S antibody levels   | 153 [4.81-613]      | 3788 [102.50-12953] | 156 [78.25-322]     | 2770 [1850-8795] |
| % of triple-positive CD4 | 0.01 [0.0-0.04]     | 0.0 [0.0-0.16]      | 0.04 [0.01-0.14]    | 0.0 [0.0-0.06]   |
| % of triple-positive CD8 | 0.0 [0.0-0.04]      | 0.0 [0.0-0.20]      | 0.04 [0.0-0.15]     | 0.0 [0.0-0.12]   |
| % of responding CD4      | 0.40 [0.24-0.81]    | 2.38 [0.0-3.03]     | 2.17 [0.64-6.32]    | 2.82 [0.57-4.88] |
| % of responding CD8      | 0.20 [0.08-0.64]    | 0.57 [0.21-1.16]    | 1.69 [0.52-5.39]    | 0.77 [0.18-4.84] |

**Table S4.** Medians and IQR of immunological parameters in PLWH stratified according to humoral response

|                          | NR               |                  | R                |                  |
|--------------------------|------------------|------------------|------------------|------------------|
|                          | T0               | T1               | T0               | T1               |
| % of triple-positive CD4 | 0.01 [0.0-0.04]  | 0.0 [0.0-0.05]   | 0.04 [0.01-0.12] | 0.0 [0.0-0.08]   |
| % of triple-positive CD8 | 0.01 [0.0-0.05]  | 0.0 [0.0-1.70]   | 0.04 [0.0-0.14]  | 0.0 [0.0-0.11]   |
| % of responding CD4      | 0.28 [0.07-0.53] | 2.3 [0.34-2.94]  | 2.02 [0.68-5.91] | 2.7 [0.51-4.70]  |
| % of responding CD8      | 0.27 [0.11-0.44] | 0.27 [0.0-17.26] | 1.68 [0.53-4.98] | 0.72 [0.24-3.67] |

**Table S5.** Medians and IQR of immunological parameters in PLWH and in the stratified subgroups at T2

|                          | PLWH            |                   |                  |                 |                  |
|--------------------------|-----------------|-------------------|------------------|-----------------|------------------|
|                          | TOT             | <200 cells/μl     | >200 cells/μl    | NR              | R                |
| Anti-S antibody levels   | 1850 [724-5430] | 12500 [840-31450] | 1770 [715-3160]  | 0.0 [0.0-0.0]   | 0.01 [0.0-0.08]  |
| % of triple-positive CD4 | 0.0 [0.0-0.08]  | 0.0 [0.0-0.03]    | 0.01 [0.0-0.09]  | 0.0 [0.0-0.03]  | 0.0 [0.0-0.08]   |
| % of triple-positive CD8 | 0.0 [0.0-0.03]  | 0.0 [0.0-0.03]    | 0.0 [0.0-0.03]   | 0.73 [0.0-8.80] | 2.73 [0.63-4.01] |
| % of responding CD4      | 2.70 [0.0-4.0]  | 0.0 [0.0-0.03]    | 1.55 [0.49-3.70] | 0.90 [0.0-1.30] | 1.35 [0.08-3.09] |
| % of responding CD8      | 1.30 [0.0-3.02] | 1.47 [0.64-4.02]  | 0.86 [0.0-2.26]  | 0.0 [0.0-0.0]   | 0.01 [0.0-0.08]  |
